# Supplementary material
Source: PubMed Central journal article supplement (PMC4161190)
Supplement: Supp_Fig1.pdf [file Supp_Fig1.pdf]

## Supplementary Data

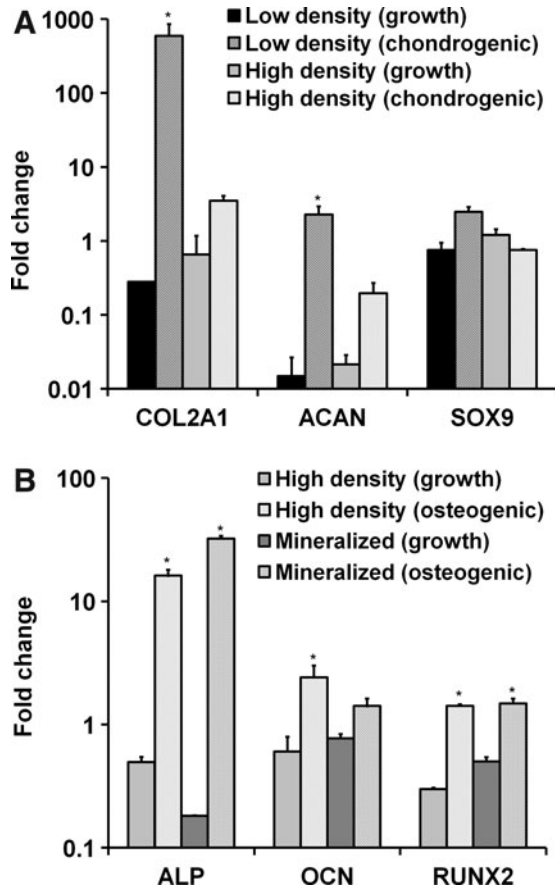

**SUPPLEMENTARY FIG. S1.** Expression of (A) chondrogenic and (B) osteogenic genes among scaffolds cultured in growth, chondrogenic, or osteogenic differentiation media after 21 days. Pure chondrogenic media elicited significant upregulation of *COL2A1* and *ACAN* in low-density scaffolds, while pure osteogenic media supported significant upregulation of *ALP* and *RUNX2* in both high-density and mineralized scaffolds. \*Significantly increased compared to growth media group for that scaffold type. Data reproduced from reference.<sup>37</sup>
